# Supplementary material for: Phosphoinositide-binding proteins mark, shape and functionally modulate highly-diverged endocytic compartments in the parasitic protist Giardia lamblia
Source: PLoS Pathog. 2020 Feb 24;16(2):e1008317. doi: 10.1371/journal.ppat.1008317 (PMC7058353; doi:10.1371/journal.ppat.1008317)
Supplement: S5 Table — (XLSX) [file ppat.1008317.s011.xlsx]

## Sheet: Export Summary Tables S1-S7
	This document was exported from Numbers. Each table was converted to an Excel worksheet. All other objects on each Numbers sheet were placed on separate worksheets. Please be aware that formula calculations may differ in Excel.
	Numbers Sheet Name	Numbers Table Name	Excel Worksheet Name			Color Code
	Table S1: GlPXD1					Bait
		Table S1. Proteins identified in the interactome of GlPXD1	Table S1_ GlPXD1 - Table S1. Pr			Clathrin assemblies
	Table S2: GlPXD2					hypothetical protein
		Table S2. Proteins identified in the interactome of GlPXD2	Table S2_ GlPXD2 - Table S2. Pr			PIP-binding proteins
	Table S3: GlPXD3					SNARE-related protein
		Table S3. Proteins identified in the interactome of GlPXD3	Table S3_ GlPXD3 - Table S3. Pr			Rab
	Table S4: GlPXD4					Giardin
		Table S4. Proteins identified in the interactome of GlPXD4	Table S4_ GlPXD4 - Table S4. Pr			Tubulin
	Table S5: GlPXD6					Proteasome-related protein
		Table S5. Proteins identified in the interactome of GlPXD6	Table S5_ GlPXD6 - Table S5. Pr			Enzyme
	Table S6: GlFYVE					Kinase
		Table S6. Proteins identified in the interactome of GlFYVE	Table S6_ GlFYVE - Table S6. Pr			Ribosomal protein
	Table S7: GlNECAP1					Protein 21.1
		Table S7. Proteins identified in the interactome of GlNECAP1	Table S7_ GlNECAP1 - Table S7.			Uncategorised protein

## Sheet: Table S5_ GlPXD6 - Table S5
Supplementary Table 5 GL50803_24488 GlPXD6
		bait specific spectral counts at given stringency parameters		bait specific exclusive spectral counts at given stringency parameters		InterProScan prediction	GO	HHPRED best hit (Probability E-value)
ORF number	Annotation	95_2_95	95_2_50	95_2_95	95_2_50
		GL50803_24488	Gl50803_24488	Gl50803_24488	Gl50803_24488
GL50803_24488	hypothetical protein	30	57	30	57
GL50803_102108	Clathrin heavy chain	8	13	8
GL50803_21423	Beta Adaptin	6	8	6	8
GL50803_14373	Dynamin (dynamin)	8	16	8	16
GL50803_16596	hypothetical protein		4		4
GL50803_17332	hypothetical protein	22	33			WD40-repeat-containing domain superfamily	GO:0005515 protein binding	serine/threonine-protein kinase 5YZV_A (95.38/0.55)
GL50803_41212	hypothetical protein	7	16	7	16	-	-	Myosin 2 heavy chain 3JBH_B (99.95/3.6e-18)
GL50803_21628	hypothetical protein	5	13	5	13	-	-	Antitoxin RelB3 3BPQ_A (80.35/4.7)
GL50803_9861	hypothetical protein	5	10			-	-	Antitoxin RelB3 3BPQ_A (82.91/3.2)
GL50803_4266	hypothetical protein	4	4	4	4	-	-	Eukaryotic translation initiation factor 3 5A5T_A (98.99/0.000002)
GL50803_113133	hypothetical protein		3		3	ClpP/crotonase-like domain superfamily	-	Protein CT_858 3DOR_A (99.94/1.5e-27)
GL50803_11720	hypothetical protein		3		3	Ankyrin repeat-containing domain superfamily	GO:0005515 protein binding	Ankyrin 1N11_A (100/1.2e-32)
GL50803_16653	hypothetical protein		3		3	Zinc finger, RING/FYVE/PHD-type	GO:0046872 metal ion binding	Zinc finger FYVE domain-containing protein 3T7L_A (99.08/3.4e-13)
GL50803_16717	hypothetical protein	3	3	3	3	START-like domain superfamily	GO:0008289 lipid binding	StAR-related lipid transfer protein 3 5I9J_A (99.89/2.5e-25)
GL50803_7204	hypothetical protein		3		3	RNA-binding superdomain	GO:0003676 nucleic acid binding	KIAA0430 protein 2DIU_A (96.43/0.00018)
GL50803_114776	NSF		11		3
GL50803_103676	Alpha-tubulin		5		5
GL50803_101291	Beta tubulin	4	7	4	7
GL50803_11654	Alpha-1 giardin		16
GL50803_114787	Alpha-7.3 giardin		4
GL50803_16867	AAA family ATPase	7	7	7	7
GL50803_13608	Acetyl-CoA synthetase	7	9	7	9
GL50803_86511	Acyl-CoA synthetase		3		3
GL50803_93358	Alcohol dehydrogenase	11	17
GL50803_112103	Arginine deiminase	8	13
GL50803_10521	Arginyl-tRNA synthetase		3		3
GL50803_11118	Enolase	3	9	3	9
GL50803_8682	Glucose-6-phosphate 1-dehydrogenase		3		3
GL50803_6226	Glycogen phosphorylase	3
GL50803_14285	Malic enzyme		3		3
GL50803_9719	NADH oxidase		3		3
GL50803_33769	NADH oxidase lateral transfer candidate		4
GL50803_21942	NADP-specific glutamate dehydrogenase	4	9	4	9
GL50803_9413	PDI2 - Protein disulfide isomerase		5		5
GL50803_8064	PDI5 - Protein disulfide isomerase		3		3
GL50803_93548	Phospholipase B		3		3
GL50803_17254	Phosphomannomutase-2		3		3
GL50803_10698	Phosphorylase B kinase gamma catalytic chain		3		3
GL50803_15983	Prolyl-tRNA synthetase	5	5	5	5
GL50803_114609	Pyruvate-flavodoxin oxidoreductase	4	5
GL50803_17063	Pyruvate-flavodoxin oxidoreductase	4	7	4	7
GL50803_7439	Ser/Thr phosphatase 2A, 65kDa reg sub A	5	6	5	6
GL50803_9704	Transketolase	4	6	4	6
GL50803_7532	Vacuolar ATP synthase catalytic subunit A		6		6
GL50803_17327	Xaa-Pro dipeptidase	3	8	3	8
GL50803_16034	Kinase, CAMK CAMKL	3	3	3	3
GL50803_15409	Kinase, NEK	11	12
GL50803_15411	Kinase, NEK-frag	8	12
GL50803_102034	Kinase, NEK-frag		3		3
GL50803_10609	Kinase, STE STE20		3		3
GL50803_90872	Phosphoglycerate kinase		3		3
GL50803_17143	Pyruvate kinase		5		5
GL50803_1345	Ribosomal protein L10a	3	3	3	3
GL50803_16387	Ribosomal protein L18a		4		4
GL50803_10091	Ribosomal protein L23	3	3	3	3
GL50803_7870	Ribosomal protein L23A	3	5	3	5
GL50803_16310	Ribosomal protein L27a	3	4	3	4
GL50803_16525	Ribosomal protein L3	3	4	3	4
GL50803_6133	Ribosomal protein L35	3	3	3	3
GL50803_7878	Ribosomal protein S14	6	6
GL50803_15260	Ribosomal protein S15		5		5
GL50803_6135	Ribosomal protein S17		3		3
GL50803_15551	Ribosomal protein S18		3		3
GL50803_10367	Ribosomal protein S24	4	5	4	5
GL50803_12981	Ribosomal protein S5		5		5
GL50803_14329	Ribosomal protein S7		3		3
GL50803_4547	Ribosomal protein S9		3		3
GL50803_27925	Protein 21.1	10	23	10	23
GL50803_17060	Protein 21.1	6	12	6	12
GL50803_14859	Protein 21.1	7	9	7	9
GL50803_21505	Protein 21.1	4	4	4	4
GL50803_9030	Protein 21.1		11
GL50803_32778	Protein 21.1		3		3
GL50803_17054	Acidic ribosomal protein P0	8	12
GL50803_137716	Axoneme-associated protein GASP-180	3	33
GL50803_17121	Bip (BiP)	29	36
GL50803_9808	Chaperone protein DnaJ subfamily A		3		3
GL50803_15148	Chaperone protein DnaJ subfamily C		3		3
GL50803_10167	Coiled-coil protein	8	12	8	12
GL50803_15591	Coiled-coil protein		3		3
GL50803_17249	Coiled-coil protein	11	15
GL50803_88765	Cytosolic HSP70	21	35	21	35
GL50803_112304	Elongation factor 1-alpha	30	37
GL50803_12102	Elongation factor 1-gamma	3	4	3	4
GL50803_17570	Elongation factor 2	8	19	8	19
GL50803_97219	Fibrillarin-like pre-rRNA processing protein Narcisi et al		3		3
GL50803_17090	Giardia trophozoite antigen GTA-1		3		3
GL50803_98054	Heat shock protein HSP 90-alpha	7	10	7	10
GL50803_13864	Heat shock protein HSP 90-alpha	3	4	3	4
GL50803_21321	High cysteine membrane protein Group 5		4		4
GL50803_121045	Histone H2B		5
GL50803_135231	Histone H3		3		3
GL50803_15106	Importin beta-3 subunit		3		3
GL50803_5795	Leucine-rich repeat protein 1 virus receptor protein	3
GL50803_33769	NADH oxidase lateral transfer candidate	3	4	3	4
GL50803_17163	Peptidyl-prolyl cis-trans isomerase B precursor		4		4
GL50803_14521	Peroxiredoxin 1	10
GL50803_7031	Spindle pole protein, putative		5		5
GL50803_17565	TBP-interacting protein TIP49	3	3	3	3
GL50803_11992	TCP-1 chaperonin subunit epsilon		5		5
GL50803_16124	TCP-1 chaperonin subunit eta	3	3	3	3
GL50803_13500	TCP-1 chaperonin subunit theta		3		3
GL50803_10255	Translation initiation factor eIF-4A, putative	3	4	3	4
GL50803_23833	Vacuolar protein sorting 35 (VPS35)		7		7
